# Supplementary material for: Does linking help? Effects and student perceptions of a learner-centered assessment implemented in introductory chemistry
Source: Royal Society of Chemistry journal article supplement (doi:10.1039/c8rp00248g), 2019-01-01
Supplement: c8rp00248g1.pdf [file c8rp00248g1.pdf]

## Appendix 1 Creative Exercises and matched questions for control groups

### Setting 1

#### Group activity 1:

Based on everything you learned from Chapter 1 to 3, write down as many correct, distinct and relevant facts you can about:

**120.1 g butane reacts with 278.5 g oxygen to form 203 g carbon dioxide and 195.6 g water. The reaction emits  $1.19 \times 10^5 \text{ J}$  energy. (Density of oxygen is 1.429 g/L)**

You'll receive 1 point for each statement. Seven statements will get you full credit for the problem.

#### Exam 1:

Based on everything you learned from Chapter 1 to 4, write down as many correct, distinct and relevant facts you can about:

**251 kg Te-120 at the temperature of  $-22 \text{ }^\circ\text{C}$  (density of Te is  $6.24 \text{ g/cm}^3$ )**

You'll receive 3 points for each statement. Six statements will get you full credit for the problem.

#### Matched questions for control group:

- For Te-120, which one of the following is TRUE?  
A. The atomic number is 120    B. The mass number is 52  
C. It contains 66 neutrons    D. It contains 52 electrons    E. It is a nonmetal
- What volume in milliliters of table salt would be needed to measure out 145 kg of salt (density =  $2.16 \text{ g/cm}^3$ )  
A.  $6.71 \times 10^{-2} \text{ mL}$     B. 67.1 mL    C.  $6.71 \times 10^4 \text{ mL}$     D.  $3.13 \times 10^2 \text{ mL}$     E.  $3.13 \times 10^5 \text{ mL}$
- A race metal alloy is a superconductor at  $-22 \text{ }^\circ\text{C}$ . What is the temperature on the Kelvin scale?  
A.  $-251 \text{ K}$     B. 251 K    C. 251.1 K    D. 25.15 K    E. 295.15 K

#### Group activity 2:

Based on everything you learned from Chapter 1 to 6, write down as many correct, distinct and relevant facts you can about:

**61.6 kg  $\text{Al}_2(\text{SO}_4)_3$**

You'll receive 1 point for each statement. Seven statements will get you full credit for the problem.

#### Exam 2:

Based on everything you learned from Chapter 1 to 7, write down as many correct, distinct and relevant facts you can about:

**107.87g  $\text{AgNO}_3$  (aq) reacts with 36.46 g  $\text{HCl}$  (aq)**

You'll receive 3 points for each statement. Six statements will get you full credit for the problem.

#### Matched questions for control group:

- All of the following compounds are soluble in water EXCEPT:  
A. NaOH    B.  $\text{CaBr}_2$     C.  $\text{FeI}_3$     D.  $\text{NH}_4\text{NO}_3$     E. AgCl
- What are the moles of 107.87 grams of silver nitrate?

- A. 0.63498 B. 0.63 C. 169.88 D.  $1.8 \times 10^4$  E.  $6.4959 \times 10^{25}$
3. What type of a reaction occurs when a silver nitrate solution is mixed with a hydrochloric acid?
- A. combination B. decomposition C. single-displacement  
D. double-displacement E. no reaction occurs

**Extra Credit:**

Based on everything you learned from this course, write down as many correct, distinct and relevant facts you can about:

**When 0.06 mol of Al reacts with 0.06 mole of  $\text{Cl}_2$ , the chemical reaction below occurs:  $2 \text{Al}(s) + 2 \text{Cl}_2(g) \rightarrow 2 \text{AlCl}_3(aq)$ , 4.0 grams of  $\text{AlCl}_3$  is formed by the reaction and used to make 255 mL  $\text{AlCl}_3$  solution.**

You will receive 0.5 points for each statement. Ten statements will get you full credit (5 points) for this assignment.

**Matched questions for control group:**

- Which one is the electron configuration of Al?  
A.  $1s^2 2s^2 2p^6 3s^2 3p^1$  B.  $1s^2 2s^2 2p^{10} 3s^2 3p^1$  C.  $1s^2 2s^2 2p^6 3s^2$  D.  $[\text{Ne}]3p^1$  E.  $[\text{Ar}]4s^2 3p^1$
- How many electrons in p subshell of Al?  
A. 0 B. 2 C. 6 D. 10 E. 13
- How many electrons does  $\text{Al}^{3+}$  have?  
A. 0 B. 3 C. 10 D. 13 E. 16
- When 0.06 mol of Al reacts with 0.06 mole of  $\text{Cl}_2$ , the chemical reaction below occurs:  $2 \text{Al}(s) + 3 \text{Cl}_2(g) \rightarrow 2 \text{AlCl}_3(aq)$ , how many grams of  $\text{AlCl}_3$  can be made?  
A. 0.04 B. 0.06 C. 5 D. 8 E. 3
- What is the molarity when 4.0 grams of  $\text{AlCl}_3$  is added to water to make 255 mL solution?  
A.  $1.2 \times 10^{-4} \text{ M}$  B.  $2.1 \times 10^3 \text{ M}$  C. 0.12 M D. 2.1 M E. 7.7 M

**Setting 2**

**Group activity 1:**

Based on everything you learned from Chapter 1 to 4, write down as many correct, distinct, and relevant facts you can about:

**251 kg Te-120 at the temperature of  $-22^\circ \text{C}$  (density of Te is  $6.24 \text{ g/cm}^3$ )**

You'll receive two points for each statement. Six statements will get you full credit for the problem.

**Exam 1:**

Based on everything you learned from Chapter 1 to 5, write down as many correct, distinct and relevant facts you can about:

**61.6 kg  $\text{Al}_2(\text{SO}_4)_3$**

You'll receive 2 points for each statement. Six statements will get you full credit for the problem.

**Matched questions for control group:**

- What is the formula mass for  $\text{B}_2\text{Cl}_4$ ?  
A. 234.34 amu. B. 127.98 amu C. 198.89 amu. D. 163.43 amu E. none of the above
- What is the name of this compound  $\text{B}_2\text{Cl}_4$ ?

- Convert 61.6 kg into grams.
- If the density of ethanol is  $0.789 \text{ g/cm}^3$ , what volume would 403 grams of ethanol occupy?

### Group activity 2:

Based on everything you learned from Chapter 1 to 8, write down as many correct, distinct and relevant facts you can about:

**107.87g AgNO<sub>3</sub> (aq) reacts with 36.46 g HCl (aq)**

You'll receive 3 point for each statement. Six statements will get you full credit for the problem.

### Exam 2:

Based on everything you learned from Chapter 1 to 9, write down as many correct, distinct and relevant facts you can about:

**710.05 g of aqueous sodium sulfate reacts with aqueous 2.0 moles of lead(II) chloride**

You'll receive 2 points for each statement. Six statements will get you full credit for the problem.

### Matched questions for control group:

Write a molecular equation for aqueous sodium sulfate reacting with aqueous plumbous nitrate. Then calculate how many formula units of plumbous nitrate are needed to react with 3.29 mol of sodium sulfate.

### Group activity 3:

Based on everything you learned from Chapter 1 to 11, write down as many correct, distinct, and relevant facts you can about:

**0.41 mol of aqueous HBr reacts with excess calcium, producing H<sub>2</sub> and CaBr<sub>2</sub>. This reaction occurs at 1.61 atm and at 45 degrees Celsius.**

You'll receive two points for each statement. Seven statements will get you full credit for the problem.

### Exam 3:

Based on everything you learned from Chapter 1 to 12, write as many distinct, accurate, and relevant statements you can for:

**2.00 mol of CH<sub>4</sub> (l) is placed in a 120.0 L container containing O<sub>2</sub> at 1.00 atm and -170. 0°C. When the container is heated to 25 °C, CH<sub>4</sub>(g) can react with O<sub>2</sub>(g). CH<sub>4</sub> boils at -164.0 °C, and  $\Delta H_{\text{vap}} = 8.17 \text{ kJ/mol}$ .  $c_{\text{liquid}} = 52.93 \text{ J/(mol } ^\circ\text{C)}$   $c_{\text{gas}} = 35.69 \text{ J/(mol } ^\circ\text{C)}$ .**

You'll receive two points for each correct statement. Six statements will get you full credit for the problem.

### Matched questions for control group:

Use the following data to answer the following questions.

|                                  | Methane (CH <sub>4</sub> ) | Oxygen |
|----------------------------------|----------------------------|--------|
| $\Delta H_{\text{fus}}$ (kJ/mol) | 1.10                       | 0.444  |
| $\Delta H_{\text{vap}}$ (kJ/mol) | 8.17                       | 6.82   |
| $C_{\text{liquid}}$ (J/mol°C)    | 52.93                      | 53.28  |
| $C_{\text{gas}}$ (J/mol°C)       | 35.69                      | 29.378 |

1. How much energy is required to completely boil 2.00 moles of methane?
2. What type of intermolecular force does methane undergo?
3. How much energy is required to change the temperature of 2.00 moles of methane from -164 °C to 25 °C? It is a gas the entire time.
4. How many moles of oxygen are present if there are 5.00 atm at 25 °C in a 120.0 L tank?
5. What are the products if methane and oxygen react?
6. Draw the Lewis structure of oxygen.

#### Group activity 4:

Based on everything you learned from Chapter 1 to 15, write down as many correct, distinct and relevant facts you can about:

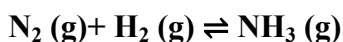

**At a certain temperature, the equilibrium constant for this reaction is  $6.00 \times 10^{-2} \text{M}^{-2}$ . The equilibrium concentrations of nitrogen and ammonia are 0.080 M and 0.13 M, respectively, and the reaction is taking place in a 5.00 L container.**

You'll receive 2 points for each statement. Seven statements will get you full credit for the problem.

#### Exam 4:

Based on everything you learned from Chapter 1 to 15, write down as many correct, distinct and relevant facts you can about:

**125 mL of 2.50 M hydrochloric acid reacts with 5.00 grams of sodium hydroxide. This reaction produces 37.34 kJ of heat.**

You'll receive 2 points for each statement. Seven statements will get you full credit for the problem.

#### Matched questions for control group:

1. How many moles of HCl are present in 125 mL of 2.50 M HCl?
2. How many moles of NaOH are present in 5.00 grams of NaOH?
3. If the HCl from problem 1 and NaOH from problem 2 are mixed, which one will be the limiting reactant?
4. If 37.34 kJ of energy are released from the reaction in problem 3, what is the  $\Delta H$  for the reaction?
5. What would be the pH of the solution resulting from problem 3?
6. What is the balanced reaction for problem 3?
7. What is the  $\text{OH}^-$  concentration of the solution resulting from problem 3?

#### Extra credit:

Based on everything you learned from this course, write down as many correct, distinct and relevant facts you can about:

**250.0 grams of uranium-235 are placed in a reactor. A nucleus of uranium-235 absorbs a neutron and undergoes nuclear fission to produce barium-141 and krypton-92. A single atom's fission produces 211.3 MeV of energy.  $1 \text{ MeV} = 1.60218 \times 10^{-13} \text{ Joules}$ .**

You will receive 2 points for each statement. Seven statements will get you full credit for this assignment.

Matched questions for control group:

1. How many atoms of uranium-235 are present in 250.0 grams of uranium-235?  
(hint: atomic mass of an isotope = the mass number)
2. If the fission of one atom of uranium-235 produces 211.3 MeV of energy, and if  $1 \text{ MeV} = 1.60218 \times 10^{-13} \text{ J}$ , how much energy will be released by 250.0 grams of uranium-235?
3. Write a reaction for the fission of uranium-235 after it is hit by a neutron if barium-141 and krypton-92 are two of the products.

## Appendix 2 Code list for generating visual maps

| Major topics                            | Concepts                                 | Major topics           | Concepts                                                                                           |
|-----------------------------------------|------------------------------------------|------------------------|----------------------------------------------------------------------------------------------------|
| <b>1. Units/Sig.Fig.</b>                | Scientific notation                      | <b>3. Energy</b>       | Classification of matter by composition *classify substances as element or compound belong to here |
|                                         | Decimal part                             |                        | -Pure substance                                                                                    |
|                                         | Exponential part                         |                        | -Element                                                                                           |
|                                         | Significant figures                      |                        | -Compound                                                                                          |
|                                         | Uncertainty                              |                        | -Mixture                                                                                           |
|                                         | Rules of significant figures             |                        | -Homogenous mixture                                                                                |
|                                         | Exact numbers                            |                        | -Heterogeneous mixture                                                                             |
|                                         | Rounding numbers                         |                        | Property                                                                                           |
|                                         | Significant figures in calculations      |                        | -Physical property                                                                                 |
|                                         | -Multiplication and Division             |                        | -Chemical property                                                                                 |
|                                         | -Addition and Subtraction                |                        | Physical change                                                                                    |
|                                         | -Both +,=,x, ÷                           |                        | Chemical change                                                                                    |
|                                         | International system (SI)                |                        | Law of conservation of mass                                                                        |
|                                         | SI base units (m, kg, s, K)              |                        | Work                                                                                               |
|                                         | Prefix multipliers                       |                        | Energy                                                                                             |
|                                         | Derived units                            |                        | -Kinetic energy                                                                                    |
|                                         | Volume                                   |                        | -Potential energy                                                                                  |
|                                         | Unit conversion                          |                        | -Thermal energy                                                                                    |
|                                         | -from one to another                     |                        | -Electrical energy                                                                                 |
|                                         | -multistep                               |                        | -Chemical energy                                                                                   |
|                                         | -in both the numerator and denominator   |                        | Law of conservation of energy                                                                      |
|                                         | -with units raised to a power            |                        | Exothermic                                                                                         |
|                                         | Units of energy and conversion           |                        | Endothermic                                                                                        |
|                                         | --(J, cal, Cal, kWh)                     |                        | Heat                                                                                               |
| Conversion between T scales (°F, °C, K) | System                                   |                        |                                                                                                    |
| Conversion factors                      | Surroundings                             |                        |                                                                                                    |
| Density = mass/volume                   | Absolute zero                            |                        |                                                                                                    |
| <b>2. Matter</b>                        | Three states of matter: solid,liquid,gas | Specific heat capacity |                                                                                                    |
|                                         | Solid                                    | $q = cm\Delta T$       |                                                                                                    |
|                                         | Crystalline                              |                        |                                                                                                    |
|                                         | Amorphous                                |                        |                                                                                                    |
|                                         | Liquid                                   |                        |                                                                                                    |
|                                         | Gas                                      |                        |                                                                                                    |
|                                         | Compressible                             |                        |                                                                                                    |

| Major topics              | Concepts                            | Major topics                       | Concepts                                   |                                                 |
|---------------------------|-------------------------------------|------------------------------------|--------------------------------------------|-------------------------------------------------|
| <b>4. Atoms</b>           | Atom                                |                                    | -Metalloid                                 |                                                 |
|                           | Atomic theory                       |                                    | Main-group elements                        |                                                 |
|                           | Plum-pudding model of the atom      |                                    | Transition metals                          |                                                 |
|                           | Nuclear theory of the atom          |                                    | Period                                     |                                                 |
|                           | Electrical Charge                   |                                    | Group/ Family                              |                                                 |
|                           | Nucleus                             |                                    | -Alkali metals                             |                                                 |
|                           | -Neutron                            |                                    | -Alkaline earth metals                     |                                                 |
|                           | Electron                            |                                    | -Halogens                                  |                                                 |
|                           | Bohr model                          |                                    | -Noble gases                               |                                                 |
|                           | Orbital                             |                                    | <b>6. Compounds</b>                        | Chemical formula (type, #, order)               |
|                           | Principal quantum number (n, shell) |                                    |                                            | Subscripts in chemical formula (ratio of atoms) |
|                           | Subshell (s,p,d,f)                  | Types of chemical formula          |                                            |                                                 |
|                           | Ground state                        | -empirical formula                 |                                            |                                                 |
|                           | Excited state                       | -molecular formula                 |                                            |                                                 |
|                           | Electron spin                       | -structural formula                |                                            |                                                 |
|                           | Pauli exclusion principle           | Molecular models                   |                                            |                                                 |
|                           | Hund's rule                         | -ball-and stick model              |                                            |                                                 |
|                           | Electron configuration              | -space-filling model               |                                            |                                                 |
|                           | Orbital diagram                     | -compounds: ionic or molecular     |                                            |                                                 |
|                           | Valence electron                    | Writing formula for ionic compound |                                            |                                                 |
| Isotopes and symbols      | Ions                                |                                    |                                            |                                                 |
| Percent natural abundance | -Cations                            |                                    |                                            |                                                 |
| Isotope symbols           | -Anions                             |                                    |                                            |                                                 |
| Mass number (A)           | Ion charge                          |                                    |                                            |                                                 |
| <b>5. Elements</b>        | Atomic mass (amu); name of element  | <b>7. Nomenclature</b>             | Polyatomic ions (formula, name and charge) |                                                 |
|                           | -elements: atomic or molecular      |                                    | -ionic compound                            |                                                 |
|                           | Periodic trend                      |                                    | Binary: Type I or Type II                  |                                                 |
|                           | -Atomic size                        |                                    | Containing polyatomic ions                 |                                                 |
|                           | -Metallic character                 |                                    | -molecular compound                        |                                                 |
|                           | -Ionization energy                  |                                    | -acid                                      |                                                 |
|                           | Atomic number (Z)                   |                                    | binary                                     |                                                 |
|                           | Chemical symbol                     |                                    | oxyacids (oxyanions)                       |                                                 |
|                           | Periodic table                      |                                    |                                            |                                                 |
|                           | -Metal                              |                                    | oxyacids (oxyanions)                       |                                                 |
|                           | -Nonmetal                           |                                    |                                            |                                                 |

| Major topics          | Concepts                                 | Major topics             | Concepts                                        |
|-----------------------|------------------------------------------|--------------------------|-------------------------------------------------|
| <b>8. Composition</b> | Avogadro's number                        | <b>10. Stoichiometry</b> | Spectator ion                                   |
|                       | Mole (mole ratio)                        |                          | Classifying chemical reaction                   |
|                       | Molar mass                               |                          | -Precipitation reaction (precipitate)           |
|                       | For an element                           |                          | -Acid-base (neutralization) reactions           |
|                       | -find molar mass from the periodic table |                          | -Gas evolution reactions                        |
|                       | -convert between grams and moles         |                          | -Oxidation-reduction (redox) reaction           |
|                       | -convert between moles and # of atoms    |                          | --Combustion reaction                           |
|                       | -convert between grams and # of atoms    |                          | Classifying chemical reactions by what atoms do |
|                       |                                          |                          | - Synthesis or combination reaction             |
|                       |                                          |                          | - Decomposition reaction                        |
|                       |                                          |                          | -Single-displacement reaction                   |
|                       |                                          |                          | -Double-displacement reaction                   |
|                       |                                          |                          | Oxidation numbers                               |
|                       |                                          |                          | oxidizing agent/reducing agent                  |
|                       | Stoichiometry                            |                          |                                                 |
|                       | Mole-to-mole                             |                          |                                                 |
|                       | Mole-to-mass                             |                          |                                                 |
|                       | Mass-to mass                             |                          |                                                 |
|                       | Limiting reactant                        |                          |                                                 |
|                       | Theoretical yield                        |                          |                                                 |
|                       | Actual yield                             |                          |                                                 |
|                       | Percent yield                            |                          |                                                 |
|                       | Enthalpy calculation                     |                          |                                                 |
| <b>9. Reactions</b>   | Evidence of a chemical reaction          | <b>11. Solutions</b>     | Solute                                          |
|                       | Reactants and products                   |                          | Solvent                                         |
|                       | States in chemical equations             |                          | Solution                                        |
|                       | Coefficient in chemical equations        |                          | Electrolyte & Nonelectrolyte solution           |
|                       | Balance chemical equations               |                          | Concentration of solution                       |
|                       | Aqueous solution                         |                          | -mass percent                                   |
|                       | Soluble compounds                        |                          | -Molarity (M)                                   |
|                       | Insoluble compounds                      |                          |                                                 |
|                       | Solubility rules                         |                          |                                                 |
|                       | Molecular equation                       |                          |                                                 |
|                       | Complete ionic equation                  |                          |                                                 |
|                       | Net ionic equation                       |                          |                                                 |



| Major topics                     | Concepts                                  | Major topics         | Concepts                                        |              |
|----------------------------------|-------------------------------------------|----------------------|-------------------------------------------------|--------------|
| <b>12. Bonding</b>               | Colligative properties                    | <b>16. acid-base</b> | Strong acids/strong bases                       |              |
|                                  | Molality                                  |                      | Weak acids/weak bases                           |              |
|                                  | Henry's law                               |                      | Buffers                                         |              |
|                                  | Stock solution                            |                      | Henderson-Hasselbalch                           |              |
|                                  | Dilution equation $M_1V_1=M_2V_2$         |                      | Self-ionization of water, $K_w$                 |              |
|                                  | Solution stoichiometry                    |                      | pH and pOH                                      |              |
|                                  | Volume-to-volume                          |                      | Titrations                                      |              |
|                                  | Lewis Structures                          |                      | Arrhenius acids/bases                           |              |
|                                  | Polarity                                  |                      | Bronsted acids/bases (including conjugates)     |              |
|                                  | Molecular geometry                        |                      | H <sup>+</sup> and OH <sup>-</sup> calculations |              |
|                                  | Electron geometry                         |                      | <b>17. nuclear</b>                              | Decay series |
|                                  | Electronegativity                         |                      |                                                 | -alpha decay |
| <b>13. Intermolecular forces</b> | London Dispersion/Van der Waal's forces   | -beta decay          |                                                 |              |
|                                  | Dipole interactions                       | -electron capture    |                                                 |              |
|                                  | Hydrogen bonding                          | -positron emission   |                                                 |              |
|                                  | Network solids                            | Fission              |                                                 |              |
|                                  | -ionic solids                             | Fusion               |                                                 |              |
|                                  | -covalent solids                          | Half-life            |                                                 |              |
|                                  | -metallic solids                          | Radioactivity        |                                                 |              |
|                                  | Boiling point/freezing point trends       |                      |                                                 |              |
| Heat of fusion                   |                                           |                      |                                                 |              |
| Heat of vaporization             |                                           |                      |                                                 |              |
| <b>14. Gases</b>                 | Gas laws                                  |                      |                                                 |              |
|                                  | $PV=nRT$                                  |                      |                                                 |              |
|                                  | Dalton's Law                              |                      |                                                 |              |
|                                  | Partial pressure                          |                      |                                                 |              |
|                                  | Pressure volume temperature relationships |                      |                                                 |              |
|                                  | Ideal gas behavior                        |                      |                                                 |              |
| <b>15. equilibrium</b>           | Reversible reactions                      |                      |                                                 |              |
|                                  | Spontaneity                               |                      |                                                 |              |
|                                  | Entropy                                   |                      |                                                 |              |
|                                  | Equilibrium constants                     |                      |                                                 |              |
|                                  | Gas-phase equilibria                      |                      |                                                 |              |
|                                  | Heterogeneous equilibria                  |                      |                                                 |              |
|                                  | Le châtlier's principle                   |                      |                                                 |              |
|                                  | Catalysts                                 |                      |                                                 |              |

### Appendix 3 Free-response survey questions and code list

|                                                                                                                                                                                                                                                                                                                                                                                                                                                                                                                                                                                                                  |                                                                                                                                                                          |
|------------------------------------------------------------------------------------------------------------------------------------------------------------------------------------------------------------------------------------------------------------------------------------------------------------------------------------------------------------------------------------------------------------------------------------------------------------------------------------------------------------------------------------------------------------------------------------------------------------------|--------------------------------------------------------------------------------------------------------------------------------------------------------------------------|
| Survey questions:                                                                                                                                                                                                                                                                                                                                                                                                                                                                                                                                                                                                |                                                                                                                                                                          |
| <ol style="list-style-type: none"> <li>1. Do you think Creative Exercises help you make connections among content in this class?</li> <li>2. Please explain why you chose the answer for question 1.</li> <li>3. How did you prepare for this type of question on exams?</li> <li>4. What are the differences when you prepared this type of question versus other types of questions such as multiple-choice questions or written ones?</li> <li>5. How easy did you find it to answer this type of question?</li> <li>6. How does this type of question help you understand chemistry conceptually?</li> </ol> |                                                                                                                                                                          |
| Categories & Codes                                                                                                                                                                                                                                                                                                                                                                                                                                                                                                                                                                                               |                                                                                                                                                                          |
| <b>Helpful category</b>                                                                                                                                                                                                                                                                                                                                                                                                                                                                                                                                                                                          |                                                                                                                                                                          |
| 1. Knowledge integration                                                                                                                                                                                                                                                                                                                                                                                                                                                                                                                                                                                         | <ol style="list-style-type: none"> <li>1.1 Aware of connections</li> <li>1.2 Use connections</li> <li>1.3 Application of knowledge (real world)</li> </ol>               |
| 2. Conceptual Understanding                                                                                                                                                                                                                                                                                                                                                                                                                                                                                                                                                                                      | <ol style="list-style-type: none"> <li>2.1 Conceptual Understanding</li> <li>2.2 Deep understanding of concepts</li> </ol>                                               |
| 3. Flexibility                                                                                                                                                                                                                                                                                                                                                                                                                                                                                                                                                                                                   | <ol style="list-style-type: none"> <li>3.1 Freedom to choose topic</li> <li>3.2 Unlimited answers</li> </ol>                                                             |
| 4. Study habits                                                                                                                                                                                                                                                                                                                                                                                                                                                                                                                                                                                                  | <ol style="list-style-type: none"> <li>4.1 Study habits (frequencies and types of actions toward studying)</li> <li>4.2 Motivation</li> <li>4.3 Metacognition</li> </ol> |
| <b>Unhelpful category</b>                                                                                                                                                                                                                                                                                                                                                                                                                                                                                                                                                                                        |                                                                                                                                                                          |
| 1. Challenging                                                                                                                                                                                                                                                                                                                                                                                                                                                                                                                                                                                                   |                                                                                                                                                                          |
| 2. Need more instruction or feedback                                                                                                                                                                                                                                                                                                                                                                                                                                                                                                                                                                             |                                                                                                                                                                          |
| 3. Self-doubt                                                                                                                                                                                                                                                                                                                                                                                                                                                                                                                                                                                                    |                                                                                                                                                                          |
